# Supplementary material for: Protection of lithium metal surfaces using tetraethoxysilane
Source: Royal Society of Chemistry journal article supplement (doi:10.1039/c0jm02305a), 2010-11-12
Supplement: c0jm02305a.pdf [file c0jm02305a.pdf]

### Supplemental Data

**Table S1** Resistances of untreated, CTMS treated, and TEOS treated lithium metal after cycling measured using electrochemical impedance spectroscopy. Each cycle represents 1000 cycles of stripping followed by 1000 cycles of plating. The average value and standard deviation of three samples is shown.

---

|                        | <b>Sample 1<br/>(ohm)</b> | <b>Sample 2<br/>(ohm)</b> | <b>Sample 3<br/>(ohm)</b> | <b>Average<br/>(ohm)</b> | <b>Standard<br/>Deviation<br/>(ohm)</b> |
|------------------------|---------------------------|---------------------------|---------------------------|--------------------------|-----------------------------------------|
| <b>Untreated Li</b>    |                           |                           |                           |                          |                                         |
| cycle 1                | 401.8                     | 392.6                     | 395.9                     | 396.8                    | 4.7                                     |
| cycle 5                | 264.3                     | 280.1                     | 269.2                     | 271.2                    | 8.1                                     |
| cycle 10               | 176.1                     | 204.5                     | 210.1                     | 196.9                    | 18.2                                    |
| cycle 20               | 88.2                      | 62.9                      | 68.7                      | 73.3                     | 13.3                                    |
| <b>CTMS treated Li</b> |                           |                           |                           |                          |                                         |
| cycle 1                | 162.5                     | 157.9                     | 161.7                     | 160.7                    | 2.5                                     |
| cycle 5                | 127.5                     | 131.1                     | 124.9                     | 127.8                    | 3.1                                     |
| cycle 10               | 80.2                      | 96.5                      | 87.6                      | 88.1                     | 8.2                                     |
| <b>TEOS treated Li</b> |                           |                           |                           |                          |                                         |
| cycle 1                | 34.7                      | 33.3                      | 37.5                      | 35.2                     | 2.1                                     |
| cycle 5                | 36.6                      | 33.1                      | 33.4                      | 34.4                     | 1.9                                     |
| cycle 10               | 34.7                      | 31.3                      | 33.5                      | 33.2                     | 1.7                                     |
| cycle 20               | 30.1                      | 32.6                      | 34.4                      | 32.4                     | 2.2                                     |
| cycle 100              | 29.8                      | 28.4                      | 29.3                      | 29.2                     | 0.7                                     |

---
